# Supplementary material for: Vanilla beyond Vanilla planifolia and Vanilla × tahitensis: Taxonomy and Historical Notes, Reproductive Biology, and Metabolites
Source: MDPI journal article supplement (doi:10.3390/plants11233311), 2022-11-30
Supplement: s1 [file s1]

# Vanilla beyond *Vanilla planifolia* and *Vanilla x tahitensis*: taxonomy and historical notes, reproductive biology and metabolites

Renatha Tavares de Oliveira<sup>1</sup>, Joana Paula da Silva Oliveira<sup>1</sup>, Andrea Furtado Macedo<sup>1</sup>

<sup>1</sup> - Integrated Laboratory of Plant Biology (LIBV), Institute of Biosciences, Federal University of the State of Rio de Janeiro

**Supplementary Table S1.** Metabolites identified from vanilla crop wild relatives and/or non-commercial vanilla species, following the alphabetical order of direct parent classes.

| Metabolite                    | Species      | Methods          | Flavor DB descriptors                                         | CID (PubChem) | Direct parent                            |
|-------------------------------|--------------|------------------|---------------------------------------------------------------|---------------|------------------------------------------|
| 2,3-butanediol                | 10c          | GC-MS            | onion, fruit, creamy, fruity, buttery                         | 262           | 1,2-diols                                |
| phenol                        | 8h, 15h, 10c | GC-MS, GC-O      | phenol, plastic, rubber, phenolic                             | 996           | 1-hydroxy-4-unsubstituted benzenoids     |
| 2,3-dihydroxypropyl acetate   | 8h           | DTD-GC-MS        |                                                               | 33510         | 1-monoacylglycerols                      |
| homoeriodictyol               | 1a, 2a       | UHPLC-MS/MS      | bitter                                                        | 73635         | 3'-O-methylated flavonoids               |
| viridiflorol                  | 10c          | GC-MS            |                                                               | 11996452      | 5,10-cycloaromadendrane sesquiterpenoids |
| alpinumisoflavone             | 1a, 2a       | UHPLC-MS/MS      |                                                               | 5490139       | 6-prenylated isoflavanones               |
| bletilol A                    | 1a, 2a       | UHPLC-MS/MS      |                                                               | 102121477     | 7-O-methylated isoflavanoids             |
| nevadensin                    | 1a, 2a       | UHPLC-MS/MS      | if glucoside can be sweet-like                                | 160921        | 8-O-methylated flavonoids                |
| 3-hydroxypropyl prop-2-enoate | 15h          | DTD-GC-MS        |                                                               | 33101         | Acrylic acid esters                      |
| methyl acrylate               | 8h, 10c, 15h | DTD-GC-MS, GC-MS |                                                               | 7294          | Acrylic acid esters                      |
| cis-beta-ocimene              | 16i          | GC-MS            |                                                               | 5320250       | Acyclic monoterpenoids                   |
| geranylacetone                | 10c          | GC-O             | magnolia, rose, fresh, floral, aldehydic, fruity, leaf, green | 1549778       | Acyclic monoterpenoids                   |
| linalool                      | 16i          | GC-MS            |                                                               | 6549          | Acyclic monoterpenoids                   |
| myrcene                       | 16i          | GC-MS            |                                                               | 31253         | Acyclic monoterpenoids                   |

|                            |              |           |                                                               |       |                         |
|----------------------------|--------------|-----------|---------------------------------------------------------------|-------|-------------------------|
| 3-hydroxy-2-pentanone      | 10c          | GC-MS     | truffle, herbal, herb                                         | 62484 | Acyloins                |
| 3-hydroxybutan-2-one       | 15h          | DTD-GC-MS | butter, cream, milky, fatty,<br>creamy, sweet, dairy, buttery | 179   | Acyloins                |
| alanine                    | 5d, 11d, 13d | NMR       |                                                               | 5950  | Alanine and derivatives |
| docosane                   | 8h, 15h, 10c | GC-MS     | alkane, waxy                                                  | 12405 | Alkanes                 |
| dodecane                   | 10c          | GC-MS     | alkane                                                        | 8182  | Alkanes                 |
| eicosane                   | 10c          | GC-MS     | alkane, waxy                                                  | 8222  | Alkanes                 |
| hentriacontane             | 15h          | DTD-GC-MS |                                                               | 12410 | Alkanes                 |
| heptacosane                | 8h, 15h, 10c | GC-MS     |                                                               | 11636 | Alkanes                 |
| heptadecane                | 10c          | GC-MS     | alkane                                                        | 12398 | Alkanes                 |
| heptane                    | 10c          | GC-MS     | alkane, ethereal, sweet                                       | 8900  | Alkanes                 |
| hexacosane                 | 8h, 15h      | DTD-GC-MS |                                                               | 12407 | Alkanes                 |
| hexadecane                 | 10c          | GC-MS     | alkane                                                        | 11006 | Alkanes                 |
| nonacosane                 | 8h, 15h      | DTD-GC-MS |                                                               | 12409 | Alkanes                 |
| pentacosane                | 8h, 15h, 10c | GC-MS     |                                                               | 12406 | Alkanes                 |
| pentadecane                | 10c          | GC-MS     | alkane, waxy                                                  | 12391 | Alkanes                 |
| tetracosane                | 8h, 15h, 10c | GC-MS     |                                                               | 12592 | Alkanes                 |
| tetradecane                | 10c          | GC-MS     | alkane, waxy, mild                                            | 12389 | Alkanes                 |
| tricosane                  | 8h, 15h, 10c | GC-MS     | alkane, waxy                                                  | 12534 | Alkanes                 |
| tridecane                  | 10c          | GC-MS     | alkane                                                        | 12388 | Alkanes                 |
| undecane                   | 10c          | GC-MS     | alkane                                                        | 14257 | Alkanes                 |
| 2,4-dihydroxy-acetophenone | 15h          | DTD-GC-MS |                                                               | 6990  | Alkyl-phenylketones     |

|                            |                      |                          |                                                                    |       |                                     |
|----------------------------|----------------------|--------------------------|--------------------------------------------------------------------|-------|-------------------------------------|
| acetovanillone             | 1a, 2a, 15h, 10c     | GC-MS, UHPLC-MS/MS, GC-O | vanilla, sweet, vanillin, faint                                    | 2214  | Alkyl-phenylketones                 |
| o-acetyl-p-cresol          | 15h                  | DTD-GC-MS                | floral, heavy, sweet, herbal                                       | 15068 | Alkyl-phenylketones                 |
| propiophenone              | 10c                  | GC-MS                    | lilac, hawthorn                                                    | 7148  | Alkyl-phenylketones                 |
| threonine                  | 5d, 11d, 13d         | NMR                      |                                                                    | 6288  | Alpha amino acids                   |
| lactic acid                | 5d, 11d, 13d, 10c    | GC-MS, NMR               | acidic (if D or L)                                                 | 612   | Alpha hydroxy acids and derivatives |
| 2,3-octanedione            | 10c                  | GC-MS                    | dill, buttery, broccoli, cooked                                    | 11449 | Alpha-diketones                     |
| butane-2,3-dione           | 15h                  | DTD-GC-MS                | butter, caramel, oily, creamy, sweet, pungent, strong              | 650   | Alpha-diketones                     |
| hexane-2,3-dione           | 15h                  | DTD-GC-MS                | butter, caramel, oily, fatty, sweet, creamy, fruity, phenolic, dry | 19707 | Alpha-diketones                     |
| pentane-2,3-dione          | 15h                  | DTD-GC-MS                | butter, cream, caramel, sweet, pungent, creamy, nutty, cheese      | 11747 | Alpha-diketones                     |
| 3-methylpentanal           | 15h                  | DTD-GC-MS                |                                                                    | 27523 | Alpha-hydrogen aldehydes            |
| pyruvic alcohol            | 8h, 15h              | DTD-GC-MS                | caramellic, sweet, pungent, ethereal                               | 8299  | Alpha-hydroxy ketones               |
| methyl pyruvate            | 10c                  | GC-MS                    |                                                                    | 11748 | Alpha-keto acids and derivatives    |
| p-methylanisole            | 10c                  | GC-MS                    | powdery, cresol, naphthyl, camphoraceous, nutty, ylang, cedar      | 7731  | Anisoles                            |
| arginine                   | 1a, 2a, 5d, 11d, 13d | NMR, UHPLC-MS/MS         | faint                                                              | 6322  | Arginine and derivatives            |
| 2-acetyl-5-methylthiophene | 10c                  | GC-MS                    |                                                                    | 83655 | Aryl alkyl ketones                  |
| 2-acetylpyrrole            | 10c                  | GC-MS, GC-O              | nut, licorice, coumarin, bread, musty, nutty, walnut               | 14079 | Aryl alkyl ketones                  |

|                           |                      |                                  |                                                                                              |        |                                        |
|---------------------------|----------------------|----------------------------------|----------------------------------------------------------------------------------------------|--------|----------------------------------------|
| acetyl furan              | 8h                   | DTD-GC-MS                        | caramel, tobacco, balsamic,<br>potato, coffee, sweet, cocoa,<br>peanut, balsam, almond, beef | 14505  | Aryl alkyl ketones                     |
| 2,5-furandicarboxaldehyde | 10c                  | GC-MS                            |                                                                                              | 69980  | Aryl-aldehydes                         |
| 5-ethylfurfural           | 8h                   | DTD-GC-MS                        |                                                                                              | 89989  | Aryl-aldehydes                         |
| 5-hydroxymethylfurfural   | 1a, 2a, 8h, 10c, 15h | GC-MS, DTD-GC-MS,<br>UHPLC-MS/MS | caramel, waxy, fatty, musty,<br>cardboard                                                    | 237332 | Aryl-aldehydes                         |
| 5-methylfurfural          | 8h, 15h, 10c         | GC-MS                            | caramel, spice, burnt sugar,<br>maple, almond                                                | 12097  | Aryl-aldehydes                         |
| furfural                  | 8h, 10c, 15h         | DTD-GC-MS, GC-MS                 | fragrant, bread, woody, sweet,<br>baked, almond                                              | 7362   | Aryl-aldehydes                         |
| asparagine                | 5d, 11d, 13d         | NMR                              |                                                                                              | 6267   | Asparagine and derivatives             |
| phenethanol               | 10c                  | GC-MS, GC-O                      | lilac, rose, rose water, honey,<br>rose flower, floral, spice, bitter,<br>rose dried         | 6054   | Benzene and substituted<br>derivatives |
| piperonal                 | 9h, 10b              | HPLC, DTD-GC-MS                  | coconut, heliotrope, powdery,<br>sweet, vanilla, flower, violet,<br>bitter                   | 8438   | Benzodioxoles                          |
| dihydroactinidiolide      | 10c                  | GC-MS                            | red fruit, coumarin, woody,<br>musk, ripe apricot                                            | 27209  | Benzofurans                            |
| dibutyl phthalate         | 10c                  | GC-MS                            | faint                                                                                        | 3026   | Benzoic acid esters                    |
| methyl benzoate           | 1a, 2a               | UHPLC-MS/MS                      | prune, cananga, floral,<br>wintergreen, lettuce, sweet,<br>almond, herb, phenolic            | 7150   | Benzoic acid esters                    |
| benzoic acid              | 10c                  | GC-MS                            | balsam, urine, faint                                                                         | 243    | Benzoic acids                          |
| benzophenone              | 10c                  | GC-MS                            | peach, powdery, apricot, rose,<br>balsam, geranium, metallic                                 | 3102   | Benzophenones                          |
| benzaldehyde              | 15h, 10c             | GC-MS                            | cherry, almond, sweet, burnt<br>sugar, sharp, strong, bitter                                 | 240    | Benzoyl derivatives                    |

|                                          |                                                   |                                        |                                                                                                                                                      |          |                     |
|------------------------------------------|---------------------------------------------------|----------------------------------------|------------------------------------------------------------------------------------------------------------------------------------------------------|----------|---------------------|
| m-anisaldehyde                           | 10b                                               | HPLC                                   | anise                                                                                                                                                | 11569    | Benzoyl derivatives |
| p-anisaldehyde                           | 10bc, 15h                                         | GC-MS, HPLC, HPLC-DAD, DTD-GC-MS, GC-O | mimosa, hawthorn, cherry, powdery, bitter, vanilla, anise, hawthorne, chocolate, balsam, creamy, minty, berry, sweet, floral, mint, almond, cinnamon | 31244    | Benzoyl derivatives |
| p-anisyl alcohol                         | 1g, 6g, 7g, 8h, 9h, 10bc, 11eg, 12g, 14g, 15h     | GC-MS, HPLC, HPLC-DAD, DTD-GC-MS, GC-O | caramel, chocolate, powdery, vanilla, rose, lilac, floral, sweet, honey, hawthorn, hyacinth, flower                                                  | 7738     | Benzyl alcohols     |
| p-hydroxybenzyl alcohol                  | 1g, 4g, 5d, 6g, 7g, 9h, 11deg, 12g, 13d, 14g, 10c | GC-MS, HPLC, HPLC-DAD, DTD-GC-MS       | coconut, bitter, sweet, fruity, almond                                                                                                               | 125      | Benzyl alcohols     |
| benzaldehyde dimethyl acetal             | 10c                                               | GC-MS                                  | wine, sharp, floral, hummus, fruity, almond, green                                                                                                   | 62375    | Benzylethers        |
| (4-methoxyphenyl) methyl tetradecanoate  | 15h                                               | DTD-GC-MS                              |                                                                                                                                                      | 18004148 | Benzyloxycarbonyls  |
| (4-methoxyphenyl)methyl hexadecanoate    | 8h, 15h                                           | DTD-GC-MS                              |                                                                                                                                                      | 10809570 | Benzyloxycarbonyls  |
| (4-methoxyphenyl)methyl octadec-9-enoate | 15h                                               | DTD-GC-MS                              |                                                                                                                                                      | 10739892 | Benzyloxycarbonyls  |
| (4-methoxyphenyl)methyl octadecanoate    | 15h                                               | DTD-GC-MS                              |                                                                                                                                                      | 23119703 | Benzyloxycarbonyls  |
| anisyl acetate                           | 15h, 10c                                          | GC-MS, GC-O                            | powdery, coumarin, vanilla, creamy, plum, sweet, balsam, fruity, cherry, almond, tonka                                                               | 7695     | Benzyloxycarbonyls  |
| anisyl formate                           | 15h, 10c                                          | GC-MS, GC-O                            | vanilla, anise, floral, fruity, seaweed                                                                                                              | 61054    | Benzyloxycarbonyls  |
| benzyl formate                           | 10c                                               | GC-MS                                  | pineapple, apricot, floral, fruity, cranberry, almond, black tea, spicy                                                                              | 7708     | Benzyloxycarbonyls  |

|                             |                            |                  |                                                                 |          |                                    |
|-----------------------------|----------------------------|------------------|-----------------------------------------------------------------|----------|------------------------------------|
| malic acid                  | 5d, 11d, 13d               | NMR              |                                                                 | 525      | Beta hydroxy acids and derivatives |
| 4-cyclopentene-1,3-dione    | 8h, 10c                    | GC-MS, DTD-GC-MS |                                                                 | 70258    | Beta-diketones                     |
| hentriacontene-2,4-dione    | 15h                        | DTD-GC-MS        |                                                                 | 56636502 | Beta-diketones                     |
| heptacosene-2,4-dione       | 8h, 15h                    | DTD-GC-MS        |                                                                 | 53966535 | Beta-diketones                     |
| nonacosene-2,4-dione        | 8h, 15h, 10c               | GC-MS, DTD-GC-MS |                                                                 | 16064344 | Beta-diketones                     |
| nonadecane-2,4-dione        | 10c                        | GC-MS            |                                                                 | 567637   | Beta-diketones                     |
| alpha-pinene oxide          | 16i                        | GC-MS            |                                                                 | 91508    | Bicyclic monoterpenoids            |
| I-R-alpha-pinene            | 16i                        | GC-MS            |                                                                 | 6654     | Bicyclic monoterpenoids            |
| (-)-beta-pinene             | 16i                        | GC-MS            |                                                                 | 440967   | Bicyclic monoterpenoids            |
| 3,4-dimethyl-2,5-furandione | 8h, 10c                    | GC-MS, DTD-GC-MS |                                                                 | 13010    | Butenolides                        |
| gibberellin A3              | 1a, 2a                     | UHPLC-MS/MS      |                                                                 | 6466     | C19-gibberellin 6-carboxylic acids |
| butyl formate               | 10c                        | GC-MS            | brandy, plum, fruity, rum                                       | 11614    | Carboxylic acid esters             |
| ethyl acetate               | 8h                         | DTD-GC-MS        | pineapple, ethereal, sweet, anise, fruity, balsam, weedy, green | 8857     | Carboxylic acid esters             |
| isopropyl acetate           | 8h                         | DTD-GC-MS        | ethereal, chemical, banana, sweet, fruity                       | 7915     | Carboxylic acid esters             |
| n-amyl formate              | 10c                        | GC-MS            | ethereal, powerful, earthy, unripe banana, fruity, green        | 12529    | Carboxylic acid esters             |
| acetic acid                 | 5d, 8h, 11d, 13d, 15h, 10c | GC-MS, NMR       | sour, pungent, sharp, vinegar                                   | 176      | Carboxylic acids                   |
| formic acid                 | 8h, 15h, 10c               | GC-MS            | pungent, vinegar, formyl                                        | 284      | Carboxylic acids                   |
| isobutyric acid             | 10c                        | GC-MS            | rancid, butter, strawberry, cheese                              | 6590     | Carboxylic acids                   |

|                                                        |              |                  |                                                             |          |                                 |
|--------------------------------------------------------|--------------|------------------|-------------------------------------------------------------|----------|---------------------------------|
| propionic acid                                         | 10c          | GC-MS            | cheesy, soy, acidic, vinegar, rancid, pungent               | 1032     | Carboxylic acids                |
| catechin                                               | 1a, 2a       | UHPLC-MS/MS      | bitter                                                      | 9064     | Catechins                       |
| cinchonain 1a                                          | 1a, 2a       | UHPLC-MS/MS      |                                                             | 442675   | Catechins                       |
| catechol                                               | 8h, 10c      | GC-MS            |                                                             | 289      | Catechols                       |
| 7-hydroxy-2-methyl-4-oxo-4H-1-benzopyran-5-acetic acid | 1a, 2a       | UHPLC-MS/MS      |                                                             | 14429402 | Chromones                       |
| cinnamaldehyde                                         | 1a, 2a       | UHPLC-MS/MS      | spice, warm, red hots, paint, clove, sweet, candy, cinnamon | 637511   | Cinnamaldehydes                 |
| methyl-3-phenylprop-2-enoate                           | 8h, 10c, 15h | DTD-GC-MS, GC-MS | balsam, sweet, cherry, strawberry                           | 637520   | Cinnamic acid esters            |
| coumaran                                               | 8h           | DTD-GC-MS        |                                                             | 10329    | Coumarans                       |
| sibiricose A1                                          | 1a, 2a       | UHPLC-MS/MS      |                                                             | 6326016  | Coumaric acids and derivatives  |
| coumarin                                               | 10b          | HPLC             | sweet, new mown hay, green, tonka, bitter                   | 323      | Coumarins and derivatives       |
| 2-ethylcyclobutanol                                    | 8h           | DTD-GC-MS        |                                                             | 37109    | Cyclic alcohols and derivatives |
| 2-hydroxy-2-cyclopenten-1-one                          | 10c          | GC-MS            |                                                             | 82674    | Cyclic ketones                  |
| cyclohexanone                                          | 8h, 15h      | DTD-GC-MS        | minty, acetone                                              | 7967     | Cyclic ketones                  |
| 1,3,5-trimethyl-cyclohexane                            | 8h           | DTD-GC-MS        |                                                             | 35364    | Cycloalkanes                    |
| bromocyclohexane                                       | 10c          | GC-MS            |                                                             | 7960     | Cyclohexyl halides              |
| methyl hexyl ether                                     | 8h           | DTD-GC-MS        | painty, herbal, sweet, fruity, lavender                     | 78484    | Dialkyl ethers                  |
| diisopropyl disulfide                                  | 10c          | GC-O             | cabbage, sulfurous, onion, alliaceous, meaty                | 77932    | Dialkyldisulfides               |

|                               |              |                  |                                                                          |          |                                    |
|-------------------------------|--------------|------------------|--------------------------------------------------------------------------|----------|------------------------------------|
| fumaric acid                  | 5d, 11d, 13d | NMR              |                                                                          | 444972   | Dicarboxylic acids and derivatives |
| 2,3-dihydro-2,5-dimethylfuran | 8h           | DTD-GC-MS        |                                                                          | 86510    | Dihydrofurans                      |
| 3H-pyran-2,6-dione            | 8h, 15h      | DTD-GC-MS        |                                                                          | 574367   | Dihydropyranones                   |
| 5,6-dihydromaltol             | 10c          | GC-MS            |                                                                          | 6429306  | Dihydropyranones                   |
| 5-hydroxy-5,6-dihydromaltol   | 10c          | GC-MS            |                                                                          | 119838   | Dihydropyranones                   |
| 1,4-dimethoxybenzene          | 10c          | GC-MS            | sweet, fennel, bitter, green, new mown hay                               | 9016     | Dimethoxybenzenes                  |
| veratraldehyde                | 10c          | GC-MS            | caramel, vanilla, creamy, sweet, woody, cherry, minty                    | 8419     | Dimethoxybenzenes                  |
| veratryl alcohol              | 15h, 10c     | GC-MS, DTD-GC-MS |                                                                          | 7118     | Dimethoxybenzenes                  |
| 2-butenal                     | 10c          | GC-MS            |                                                                          | 447466   | Enals                              |
| 4,5-epoxydec-2(trans)-enal    | 10c          | GC-O             |                                                                          | 15825667 | Enals                              |
| (5Z)-octa-1,5-dien-3-one      | 10c          | GC-O             |                                                                          | 6429343  | Enones                             |
| 1-octen-3-one                 | 10c          | GC-O             | herbal, earthy, metal, musty, mushroom, dirty                            | 61346    | Enones                             |
| 3-octen-2-one                 | 10c          | GC-MS, GC-O      | crushed bug, nut, herbal, earthy, hay, sweet, blueberry, mushroom, spicy | 5363229  | Enones                             |
| 4-hexen-3-one                 | 10c          | GC-MS            | ethereal, pungent, tropical, metallic, spicy, green                      | 5365811  | Enones                             |
| ethyl caprate                 | 10c          | GC-MS            | apple, brandy, waxy, grape, oily, sweet, fruity, pear                    | 8048     | Fatty acid esters                  |
| ethyl caprylate               | 10c          | GC-MS            | apricot, fat, wine, waxy, banana, brandy, fruit, sweet, fruity, pear     | 7799     | Fatty acid esters                  |
| ethyl oleate                  | 10c          | GC-MS            |                                                                          | 5363269  | Fatty acid esters                  |



|                                                 |          |             |                                                                      |           |                          |
|-------------------------------------------------|----------|-------------|----------------------------------------------------------------------|-----------|--------------------------|
| ethyl palmitate                                 | 8h, 10c  | GC-MS       | mild, wax, milky, waxy, creamy, fruity, balsam                       | 12366     | Fatty acid esters        |
| isopropyl myristate                             | 10c      | GC-MS       | oily, fatty, faint, cinnamon                                         | 8042      | Fatty acid esters        |
| methyl cis- 12-octadecenoate                    | 10c      | GC-MS       |                                                                      | 5370350   | Fatty acid esters        |
| methyl palmitate                                | 15h, 10c | GC-MS       | oily, fatty, waxy                                                    | 8181      | Fatty acid methyl esters |
| 1-dodecanol                                     | 10c      | GC-MS       | coconut, wax, fat, waxy, fatty, earthy, honey, soapy                 | 8193      | Fatty alcohols           |
| 1-hexanol                                       | 10c      | GC-MS       | oil, alcoholic, ethereal, resin, fusel, sweet, fruity, flower, green | 8103      | Fatty alcohols           |
| 1-octen-3-ol                                    | 10c      | GC-MS       | raw, fishy, oily, earthy, fungal, chicken, mushroom, green           | 18827     | Fatty alcohols           |
| heptacosan-1-ol                                 | 8h, 15h  | DTD-GC-MS   |                                                                      | 74822     | Fatty alcohols           |
| hexacosan-1-ol                                  | 8h, 15h  | DTD-GC-MS   |                                                                      | 68171     | Fatty alcohols           |
| octacosan-1-ol                                  | 15h      | DTD-GC-MS   |                                                                      | 68406     | Fatty alcohols           |
| cis-9-octadecenal                               | 10c      | GC-MS       |                                                                      | 5364492   | Fatty aldehydes          |
| hexacosanal                                     | 8h       | DTD-GC-MS   |                                                                      | 3084462   | Fatty aldehydes          |
| luteolin 7-glucoside-4'-(Z-2-methyl-2-butenate) | 1a, 2a   | UHPLC-MS/MS | sweet-like                                                           | 44258141  | Flavonoid-7-O-glycosides |
| wyerol                                          | 1a, 2a   | UHPLC-MS/MS |                                                                      | 131752561 | Furanoid fatty acids     |
| 2-hydroxyfuraneol                               | 10c      | GC-MS       |                                                                      | 538757    | Furanones                |
| furaneol                                        | 8h, 15h  | DTD-GC-MS   | caramel, strawberry, grape, cotton, sweet, sugar, candy, almond      | 19309     | Furanones                |
| methyl furan-2-carboxylate                      | 8h       | DTD-GC-MS   | tobacco, fungal, sweet, fruity, mushroom                             | 11902     | Furoic acid esters       |

|                                                          |                      |                  |                                                                          |           |                                  |
|----------------------------------------------------------|----------------------|------------------|--------------------------------------------------------------------------|-----------|----------------------------------|
| 3-pentyl-5-methyldihydro-2(3H)-furanone                  | 10c                  | GC-MS            |                                                                          | 12393246  | Gamma butyrolactones             |
| a,d-dimethyltetronic acid                                | 8h                   | DTD-GC-MS        |                                                                          | 228435    | Gamma butyrolactones             |
| $\gamma$ -butyrolactone                                  | 8h, 15h              | DTD-GC-MS        | caramel, oily, fatty, sweet, creamy                                      | 7302      | Gamma butyrolactones             |
| $\gamma$ -nonalactone                                    | 10c                  | GC-O             | peach, coconut, waxy, oily, creamy, sweet, buttery                       | 7710      | Gamma butyrolactones             |
| 4-oxopentanoic acid                                      | 8h                   | DTD-GC-MS        | caramel, acetoin, acidic, sweet, buttery                                 | 11579     | Gamma-keto acids and derivatives |
| galactosylglycerol                                       | 1a, 2a               | UHPLC-MS/MS      | sweet                                                                    | 16048618  | Glycosylglycerols                |
| 2-methyl-3-furanthiol                                    | 10c                  | GC-O             | coconut, meat, sulfury, fishy, metallic, meaty                           | 34286     | Heteroaromatic compounds         |
| 2-pentylfuran                                            | 10c                  | GC-MS            | butter, green bean, vegetable, earthy, beany, fruity, metallic, green    | 19602     | Heteroaromatic compounds         |
| 3-furfurol                                               | 10c                  | GC-MS            |                                                                          | 20449     | Heteroaromatic compounds         |
| furfuryl alcohol                                         | 8h, 15h              | DTD-GC-MS        | coffee, alcoholic, bitter, musty, chemical, caramel, sweet, burnt, bread | 7361      | Heteroaromatic compounds         |
| glucose (D-glucose, $\alpha$ -glucose, $\beta$ -glucose) | 1a, 2a, 5d, 11d, 13d | NMR, UHPLC-MS/MS | sweet                                                                    | 5793      | Hexoses                          |
| L-histidine                                              | 1a, 2a               | UHPLC-MS/MS      | bitter                                                                   | 6274      | Histidine and derivatives        |
| glucosyringic acid                                       | 1a, 2a               | UHPLC-MS/MS      |                                                                          | 10383888  | Hydrolyzable tannins             |
| newbouldioside A                                         | 1a, 2a               | UHPLC-MS/MS      |                                                                          | 102180527 | Hydrolyzable tannins             |
| vanillic acid 4-beta-D-glucoside                         | 1a, 2a               | UHPLC-MS/MS      |                                                                          | 14132336  | Hydrolyzable tannins             |
| citramalic acid                                          | 1a, 2a               | UHPLC-MS/MS      |                                                                          | 1081      | Hydroxy fatty acids              |
| ethyl vanillin                                           | 10b                  | HPLC             | vanilla, caramel, sweet, creamy                                          | 8467      | Hydroxybenzaldehydes             |

|                                |                                                       |                                               |                                                                                    |          |                                 |
|--------------------------------|-------------------------------------------------------|-----------------------------------------------|------------------------------------------------------------------------------------|----------|---------------------------------|
| p-hydroxybenzaldehyde          | 1ag, 2a, 6g, 7g, 8h, 10bc, 11eg, 12g, 14g, 15h        | GC-MS, HPLC, HPLC-DAD, DTD-GC-MS, UHPLC-MS/MS | woody, sweet, balsam, nutty, almond                                                | 126      | Hydroxybenzaldehydes            |
| p-hydroxybenzoic acid          | 1ag, 2a, 3g, 4g, 6g, 7g, 9h, 10b, 11eg, 12g, 14g, 15h | HPLC, HPLC-DAD, DTD-GC-MS, UHPLC-MS/MS        | nutty, phenolic                                                                    | 135      | Hydroxybenzoic acid derivatives |
| protocatechuic acid            | 1a, 2a                                                | UHPLC-MS/MS                                   | phenolic, balsamic, mild                                                           | 72       | Hydroxybenzoic acid derivatives |
| 1-O-sinapoylglucose            | 1a, 2a                                                | UHPLC-MS/MS                                   |                                                                                    | 6168296  | Hydroxycinnamic acid glycosides |
| p-hydroxycinnamic acid         | 1a, 2a                                                | UHPLC-MS/MS                                   | balsam, balsamic                                                                   | 637542   | Hydroxycinnamic acids           |
| plumieride                     | 1a, 2a                                                | UHPLC-MS/MS                                   |                                                                                    | 72319    | Iridoid O-glycosides            |
| tectoridin                     | 1a, 2a                                                | UHPLC-MS/MS                                   | sweet-like                                                                         | 5281810  | Isoflavonoid O-glycosides       |
| isoleucine                     | 5d, 11d, 13d                                          | NMR                                           |                                                                                    | 6306     | Isoleucine and derivatives      |
| acetoin propyleneglycol acetal | 10c                                                   | GC-MS                                         |                                                                                    | 11971259 | Ketals                          |
| 2-heptanone                    | 10c                                                   | GC-MS                                         | coconut, soap, herbal, sweet, woody, fruity, spicy, cinnamon                       | 8051     | Ketones                         |
| 2-nonanone                     | 10c                                                   | GC-MS                                         | soap, herbal, fresh, fishy, hot milk, earthy, sweet, soapy, weedy, green           | 13187    | Ketones                         |
| 3-methylpentan-2-one           | 15h                                                   | DTD-GC-MS                                     |                                                                                    | 11262    | Ketones                         |
| 3-octanone                     | 10c                                                   | GC-MS                                         | butter, herbal, resin, fresh, mushroom, sweet, lavender, herb                      | 246728   | Ketones                         |
| pentan-2-one                   | 15h                                                   | DTD-GC-MS                                     | potato, alcohol, ether, ethereal, wine, banana, fishy, fruit, sweet, woody, fruity | 7895     | Ketones                         |
| leucine                        | 5d, 11d, 13d                                          | NMR                                           |                                                                                    | 6106     | Leucine and derivatives         |
| 9,12-octadecadienoic acid      | 8h, 15h                                               | DTD-GC-MS                                     |                                                                                    | 3931     | Lineolic acids and derivatives  |

|                         |                 |                        |                                                                                                        |         |                                |
|-------------------------|-----------------|------------------------|--------------------------------------------------------------------------------------------------------|---------|--------------------------------|
| ethyl linoleate         | 10c             | GC-MS                  |                                                                                                        | 5282184 | Lineolic acids and derivatives |
| ethyl linolenate        | 10c             | GC-MS                  |                                                                                                        | 5367460 | Lineolic acids and derivatives |
| linoleic acid           | 10c             | GC-MS                  | fatty, faint                                                                                           | 5280450 | Lineolic acids and derivatives |
| heptadecanoic acid      | 8h, 15h         | DTD-GC-MS              |                                                                                                        | 10465   | Long-chain fatty acids         |
| hexadecanoic acid       | 8h, 15h, 10c    | GC-MS                  | fatty, slightly waxy                                                                                   | 985     | Long-chain fatty acids         |
| octadecanoic acid       | 8h, 15h         | DTD-GC-MS              | fatty, odorless, mild                                                                                  | 5281    | Long-chain fatty acids         |
| oleic acid              | 1a, 2a, 8h, 15h | DTD-GC-MS, UHPLC-MS/MS | lard, fat, waxy, fatty, fried, faint                                                                   | 445639  | Long-chain fatty acids         |
| palmitoleic acid        | 15h             | DTD-GC-MS              |                                                                                                        | 445638  | Long-chain fatty acids         |
| pentadecanoic acid      | 8h, 15h, 10c    | GC-MS                  | waxy                                                                                                   | 13849   | Long-chain fatty acids         |
| tetradecanoic acid      | 8h, 15h, 10c    | GC-MS                  | fatty, soapy, waxy, coconut                                                                            | 11005   | Long-chain fatty acids         |
| 1-hexadecanol           | 10c             | GC-MS                  | wax, floral, waxy, flower                                                                              | 2682    | Long-chain fatty alcohols      |
| 1-octadecanol           | 10c             | GC-MS                  | oil, bland                                                                                             | 8221    | Long-chain fatty alcohols      |
| (2E,4E)-deca-2,4-dienal | 10c             | GC-MS, GC-O            | citrus, orange, nut, wax, meat, fat, fresh, fatty, oily, cucumber, sweet, melon, pumpkin, fried, green | 5283349 | Medium-chain aldehydes         |
| (2E,4Z)-deca-2,4-dienal | 10c             | GC-MS, GC-O            | fat, waxy, fatty, geranium, fried, green                                                               | 6427087 | Medium-chain aldehydes         |
| (2E,6E)-nona-2,6-dienal | 10c             | GC-O                   | citrus, fresh, green, melon, cucumber                                                                  | 636687  | Medium-chain aldehydes         |
| 10-undecenal            | 10c             | GC-O                   | citrus, rose, waxy, mandarin, fatty, aldehydic, soapy                                                  | 8187    | Medium-chain aldehydes         |
| 2,4-nonadienal          | 10c             | GC-O                   |                                                                                                        | 5283339 | Medium-chain aldehydes         |
| 2-undecenal             | 10c             | GC-O                   | citrus, soap, orange peel, fat, fresh, sweet, fruity, green                                            | 5283356 | Medium-chain aldehydes         |

|                     |              |             |                                                                                                             |         |                          |
|---------------------|--------------|-------------|-------------------------------------------------------------------------------------------------------------|---------|--------------------------|
| 3,3-dimethylhexanal | 8h           | DTD-GC-MS   |                                                                                                             | 558458  | Medium-chain aldehydes   |
| cis-3-hexenal       | 10c          | GC-O        | apple, fatty, fruity, leaf, grassy, weedy, green                                                            | 643941  | Medium-chain aldehydes   |
| cis-3-nonenal       | 10c          | GC-MS, GC-O | cucumber                                                                                                    | 6431042 | Medium-chain aldehydes   |
| decanal             | 8h, 15h      | DTD-GC-MS   | citrus, soap, orange peel, tallow, waxy, floral, sweet, aldehydic                                           | 8175    | Medium-chain aldehydes   |
| heptanal            | 10c          | GC-MS       | citrus, ozone, fat, herbal, fresh, wine-lee, rancid, fatty, aldehydic, green                                | 8130    | Medium-chain aldehydes   |
| hexanal             | 10c          | GC-O        | leafy, grass, sweaty, tallow, fat, fresh, fatty, fruity, aldehydic, green                                   | 6184    | Medium-chain aldehydes   |
| nonanal             | 8h, 15h, 10c | GC-MS, GC-O | citrus, lime, orange peel, rose, fat, green, fishy, waxy, fresh, fatty, peely, aldehydic, orris, grapefruit | 31289   | Medium-chain aldehydes   |
| octanal             | 10c          | GC-O        | lemon, citrus, soap, orange peel, fat, waxy, fatty, aldehydic, green                                        | 454     | Medium-chain aldehydes   |
| trans-2-heptenal    | 10c          | GC-MS, GC-O | soap, vegetable, fat, fresh, fatty, pungent, almond, green                                                  | 5283316 | Medium-chain aldehydes   |
| trans-2-nonenal     | 10c          | GC-MS       | waxy, green, fatty, paper, melon, cucumber                                                                  | 5283335 | Medium-chain aldehydes   |
| trans-2-octenal     | 10c          | GC-MS       | nut, fat, herbal, fresh, green, fatty, banana, waxy, leaf, cucumber                                         | 5283324 | Medium-chain aldehydes   |
| decanoic acid       | 10c          | GC-MS       | sour, citrus, fat, rancid, fatty, unpleasant                                                                | 2969    | Medium-chain fatty acids |
| heptanoic acid      | 10c          | GC-MS       | sour, cheesy, sweat, rancid, cheese                                                                         | 8094    | Medium-chain fatty acids |
| nonanoic acid       | 10c          | GC-MS       | cultured dairy, fat, waxy, green, dirty, cheese                                                             | 8158    | Medium-chain fatty acids |

|                                   |                                                 |                                                 |                                                                                                                  |         |                         |
|-----------------------------------|-------------------------------------------------|-------------------------------------------------|------------------------------------------------------------------------------------------------------------------|---------|-------------------------|
| carvone                           | 16i                                             | GC-MS                                           |                                                                                                                  | 7439    | Menthane monoterpenoids |
| cis-beta-terpineol                | 16i                                             | GC-MS                                           |                                                                                                                  | 8748    | Menthane monoterpenoids |
| cis-carveol                       | 16i                                             | GC-MS                                           |                                                                                                                  | 330573  | Menthane monoterpenoids |
| L-h-terpineol                     | 16i                                             | GC-MS                                           |                                                                                                                  | 17100   | Menthane monoterpenoids |
| limonene                          | 10c                                             | GC-MS                                           | lemon, citrus, orange, herbal,<br>woody, terpene, citric, camphor                                                | 22311   | Menthane monoterpenoids |
| S-(-)-limonene                    | 16i                                             | GC-MS                                           |                                                                                                                  | 439250  | Menthane monoterpenoids |
| terpinolene                       | 16i                                             | GC-MS                                           |                                                                                                                  | 11463   | Menthane monoterpenoids |
| trans-dihydrocarvone              | 16i                                             | GC-MS                                           |                                                                                                                  | 6432474 | Menthane monoterpenoids |
| $\alpha$ -terpineol               | 9h                                              | DTD-GC-MS                                       | oil, mint, citrus, lilac, floral,<br>woody, anise, terpene, pine                                                 | 442501  | Menthane monoterpenoids |
| 4-hydroxy-3- methoxyphenylacetone | 10c                                             | GC-MS                                           |                                                                                                                  | 17262   | Methoxyphenols          |
| 4-vinylguaiaicol                  | 1a, 2a, 8h, 10c                                 | GC-MS, UHPLC-MS/MS,<br>GC-O                     | curry, smoky, clove, peanut,<br>spicy                                                                            | 332     | Methoxyphenols          |
| creosol                           | 8h, 10c, 15h                                    | DTD-GC-MS, GC-MS, GC-<br>O                      | phenolic, clove, leather, smoky,<br>bacon, medical, mesquite,<br>carnation, medicinal, bitter,<br>vanilla, spice | 7144    | Methoxyphenols          |
| guaiaicol                         | 8h, 15h, 10c                                    | GC-MS                                           | spice, vanilla, smoky, sweet,<br>woody, phenolic, medicine,<br>medicinal, smoke                                  | 460     | Methoxyphenols          |
| homovanillic acid                 | 10c                                             | GC-MS                                           |                                                                                                                  | 1738    | Methoxyphenols          |
| syringic aldehyde                 | 15h                                             | DTD-GC-MS                                       | mild, sweet, woody, tonka,<br>plastic                                                                            | 8655    | Methoxyphenols          |
| vanillin                          | 1a, 2a, 6g, 7g, 8h, 9h,<br>10bc, 11eg, 14g, 15h | GC-MS, HPLC, HPLC-<br>DAD, UHPLC-MS/MS,<br>GC-O | vanilla, chocolate, sweet, creamy                                                                                | 1183    | Methoxyphenols          |

|                                                   |                                              |                                             |                                                                           |           |                                        |
|---------------------------------------------------|----------------------------------------------|---------------------------------------------|---------------------------------------------------------------------------|-----------|----------------------------------------|
| vanillin 1,2-glyceryl acetal I                    | 10c                                          | GC-MS                                       |                                                                           | 82115125  | Methoxyphenols                         |
| vanillyl acetone                                  | 15h                                          | DTD-GC-MS                                   | vanilla, clove, animal, sweet, ginger, woody, spicy, phenolic             | 31211     | Methoxyphenols                         |
| vanillyl alcohol                                  | 1ag, 2a, 3g, 6g, 7g, 9h, 11eg, 12g, 14g, 15h | HPLC, HPLC-DAD, DTD-GC-MS, UHPLC-MS/MS      | vanilla, sweet, anise, creamy, balsam, tonka, phenolic                    | 62348     | Methoxyphenols                         |
| methyl acetate                                    | 10c                                          | GC-MS                                       | sweet, bitter, ether, fruity                                              | 6584      | Methyl esters                          |
| 2-methylbutyric acid                              | 10c                                          | GC-MS                                       | sour, sweat, acid, strawberry, roquefort cheese, pungent, cheese          | 8314      | Methyl-branched fatty acids            |
| isovaleric acid                                   | 10c                                          | GC-MS, GC-O                                 | sour, sweat, acid, stinky, sweaty, animal, rancid, tropical, feet, cheese | 10430     | Methyl-branched fatty acids            |
| methyl vanillate                                  | 8h, 15h, 10c                                 | GC-MS                                       | butterscotch, caramel, warm, vanilla, spicy                               | 19844     | M-methoxybenzoic acids and derivatives |
| vanillic acid                                     | 1ag, 2a, 6g, 7g, 8h, 9h, 10b, 11eg, 12g, 15h | HPLC, HPLC-DAD, DTD-GC-MS, NMR, UHPLC-MS/MS | powdery, vanilla, bean, milky, sweet, creamy, dairy                       | 8468      | M-methoxybenzoic acids and derivatives |
| 1-hydroxy-2-pentanone                             | 10c                                          | GC-MS                                       |                                                                           | 522131    | Monosaccharides                        |
| fructose ( $\alpha$ -fructose, $\beta$ -fructose) | 5d, 11d, 13d                                 | NMR                                         |                                                                           | 5984      | Monosaccharides                        |
| 1,4-dimethylpiperazine                            | 15h                                          | DTD-GC-MS                                   |                                                                           | 7818      | N-methylpiperazines                    |
| 6-O-alpha-L-rhamnopyranosylcatalpol               | 1a, 2a                                       | UHPLC-MS/MS                                 |                                                                           | 102252680 | O-glycosyl compounds                   |
| rhodioloside                                      | 1a, 2a                                       | UHPLC-MS/MS                                 |                                                                           | 159278    | O-glycosyl compounds                   |
| sucrose                                           | 5d, 11d, 13d                                 | NMR                                         |                                                                           | 5988      | O-glycosyl compounds                   |
| verbasoside                                       | 1a, 2a                                       | UHPLC-MS/MS                                 |                                                                           | 11754080  | O-glycosyl compounds                   |
| anisyl salicylate                                 | 10c                                          | GC-MS                                       |                                                                           | 3085862   | O-Hydroxybenzoic acid esters           |
| trans-carvone oxide                               | 16i                                          | GC-MS                                       |                                                                           | 11829800  | Oxepanes                               |

|                                            |                      |                                  |                                                                                             |           |                                                |
|--------------------------------------------|----------------------|----------------------------------|---------------------------------------------------------------------------------------------|-----------|------------------------------------------------|
| cis-carvone oxide                          | 16i                  | GC-MS                            |                                                                                             | 11030188  | Oxepanes                                       |
| limonene oxide                             | 16i                  | GC-MS                            |                                                                                             | 91496     | Oxepanes                                       |
| limonene oxide, cis                        | 16i                  | GC-MS                            |                                                                                             | 6432449   | Oxepanes                                       |
| limonene oxide, trans                      | 16i                  | GC-MS                            |                                                                                             | 8029780   | Oxepanes                                       |
| D-arabinose                                | 1a, 2a               | UHPLC-MS/MS                      | sweet                                                                                       | 439195    | Pentoses                                       |
| methyl creosol                             | 10c                  | GC-MS                            |                                                                                             | 75715     | Phenol ethers                                  |
| apiopaeonoside                             | 1a, 2a               | UHPLC-MS/MS                      |                                                                                             | 127509    | Phenolic glycosides                            |
| arbutin                                    | 1a, 2a               | UHPLC-MS/MS                      | bitter                                                                                      | 440936    | Phenolic glycosides                            |
| coelovirin A or B                          | 1a, 2a               | UHPLC-MS/MS                      |                                                                                             | 132472119 | Phenolic glycosides                            |
| glucovanillin                              | 1a, 2a               | UHPLC-MS/MS                      | bitter                                                                                      | 6452133   | Phenolic glycosides                            |
| icariside D2                               | 1a, 2a               | UHPLC-MS/MS                      |                                                                                             | 10614148  | Phenolic glycosides                            |
| paeonoside                                 | 1a, 2a               | UHPLC-MS/MS                      |                                                                                             | 442924    | Phenolic glycosides                            |
| pseudolaroside A                           | 1a, 2a               | UHPLC-MS/MS                      |                                                                                             |           | Phenolic glycosides                            |
| phenylacetaldehyde                         | 1a, 2a               | UHPLC-MS/MS                      | hyacinth, honey, clover, sweet, hawthorne, cocoa, grapefruit, green, peanut, floral, bitter | 998       | Phenylacetaldehydes                            |
| phenylalanine                              | 1a, 2a, 5d, 11d, 13d | NMR, UHPLC-MS/MS                 | bitter (L), sweet (D)                                                                       | 6140      | Phenylalanine and derivatives                  |
| 1-(4-methoxyphenyl)- 2-methyl-3-buten-1-ol | 15h                  | DTD-GC-MS                        |                                                                                             | 586295    | Phenylpropanes                                 |
| propyl 4-hydroxybenzoate                   | 8h                   | DTD-GC-MS                        | burnt, smoky, sweet, woody, hawthorn                                                        | 7175      | <i>p</i> -Hydroxybenzoic acid alkyl esters     |
| isovanillic acid                           | 10c                  | GC-MS                            |                                                                                             | 12575     | <i>p</i> -methoxybenzoic acids and derivatives |
| p-anisic acid                              | 8h, 10bc, 15h        | GC-MS, HPLC, HPLC-DAD, DTD-GC-MS | putrid, sweet, faint, cadaverous                                                            | 7478      | <i>p</i> -methoxybenzoic acids and derivatives |



|                      |              |             |                                                                                  |          |                              |
|----------------------|--------------|-------------|----------------------------------------------------------------------------------|----------|------------------------------|
| 1-butanol            | 10c          | GC-MS       | oil, vanilla, fruit, fusel, sweet, balsam, medicine, medicinal                   | 263      | Primary alcohols             |
| 1-pentanol           | 10c          | GC-MS       | oil, balsamic, vanilla, fusel, sweet, balsam                                     | 6276     | Primary alcohols             |
| ethanol              | 5d, 11d, 13d | NMR         |                                                                                  | 702      | Primary alcohols             |
| neoheptanol          | 8h           | DTD-GC-MS   |                                                                                  | 16911    | Primary alcohols             |
| maltol               | 8h, 15h, 10c | GC-MS, GC-O | caramel, jam, bread, cotton, sweet, fruity, baked, candy                         | 8369     | Pyranones and derivatives    |
| 2-ethylpyrazine      | 10c          | GC-MS       | butter, peanut, musty, cocoa, nutty, wood, roasted, woody, bitter, peanut butter | 26331    | Pyrazines                    |
| 2-acetyl-1-pyrroline | 10c          | GC-O        | roast, nut, roasted, ham, sweet, nutty                                           | 522834   | Pyrrolines                   |
| quinic acid          | 1a, 2a       | UHPLC-MS/MS |                                                                                  | 6508     | Quinic acids and derivatives |
| hexan-2-ol           | 15h          | DTD-GC-MS   | chemical, winey                                                                  | 12297    | Secondary alcohols           |
| trans-3-penten-2-ol  | 10c          | GC-MS       | vinyl, green                                                                     | 5366239  | Secondary alcohols           |
| alpha-cadinol        | 10c          | GC-MS       |                                                                                  | 10398656 | Sesquiterpenoids             |
| alpha-calacorene     | 10c          | GC-MS       |                                                                                  | 12302243 | Sesquiterpenoids             |
| alpha-d-curcumene    | 10c          | GC-MS       | herb                                                                             | 92139    | Sesquiterpenoids             |
| cadalene             | 10c          | GC-MS       |                                                                                  | 10225    | Sesquiterpenoids             |
| calamenene           | 10c          | GC-MS       |                                                                                  | 6429077  | Sesquiterpenoids             |
| delta-cadinene       | 10c          | GC-MS       | herbal, woody, thyme, wood, medicine, dry                                        | 441005   | Sesquiterpenoids             |
| epi-alpha-cadinol    | 10c          | GC-MS       | earthy, odorless, balsam                                                         | 160799   | Sesquiterpenoids             |
| epi-alpha-muurolol   | 10c          | GC-MS       | spicy, herbal, weak spice, herb                                                  | 3084331  | Sesquiterpenoids             |

|                                       |              |                    |                                                      |          |                                        |
|---------------------------------------|--------------|--------------------|------------------------------------------------------|----------|----------------------------------------|
| gamma-muurolene                       | 10c          | GC-MS              |                                                      | 12313020 | Sesquiterpenoids                       |
| hexahydrofarnesyl acetone             | 10c          | GC-MS              | jasmin, herbal, fat, oily, woody, celery             | 10408    | Sesquiterpenoids                       |
| acetaldehyde                          | 15h          | DTD-GC-MS          | ethereal, ether, whiskey, pungent, fruity, aldehydic | 177      | Short-chain aldehydes                  |
| 4-methyl-2 oxovaleric acid            | 15h          | DTD-GC-MS          | fruity                                               | 70       | Short-chain keto acids and derivatives |
| butanoic acid                         | 10c          | GC-MS              | butter, sweat, acetic, sharp, rancid, fruit, cheese  | 264      | Straight chain fatty acids             |
| 4-vinylphenol                         | 1a, 2a, 10c  | GC-MS, UHPLC-MS/MS | medical, chemical, almond shell, sweet, phenolic     | 62453    | Styrenes                               |
| styrene                               | 10c          | GC-MS              | balsamic, gasoline, floral, sweet, balsam, plastic   | 7501     | Styrenes                               |
| 2-methyl-3-buten-2-ol                 | 10c          | GC-MS              | oily, earthy, herbal, herb                           | 8257     | Tertiary alcohols                      |
| tert-amyl alcohol                     | 10c          | GC-MS              | pungent                                              | 6405     | Tertiary alcohols                      |
| homocitric acid (in its lactone form) | 5d, 13d      | NMR                |                                                      | 28371    | Tricarboxylic acids and derivatives    |
| squalene                              | 8h, 15h, 10c | GC-MS,             |                                                      | 638072   | Triterpenoids                          |
| tyrosine                              | 5d, 13d      | NMR                | sweet (D)                                            | 6057     | Tyrosine and derivatives               |
| tyrosol                               | 1a, 2a       | UHPLC-MS/MS        | floral, sweet, fruity, mild                          | 10393    | Tyrosols                               |
| 1-eicosene                            | 10c          | GC-MS              |                                                      | 18936    | Unsaturated aliphatic hydrocarbons     |
| 1-tricosene                           | 8h, 15h      | DTD-GC-MS          |                                                      | 181154   | Unsaturated aliphatic hydrocarbons     |
| cis-9-tricosene                       | 10c          | GC-MS              |                                                      | 5365075  | Unsaturated aliphatic hydrocarbons     |

|                                                                 |              |             |        |                                    |
|-----------------------------------------------------------------|--------------|-------------|--------|------------------------------------|
| docosene                                                        | 15h          | DTD-GC-MS   | 74138  | Unsaturated aliphatic hydrocarbons |
| hexacosene                                                      | 15h          | DTD-GC-MS   | 29303  | Unsaturated aliphatic hydrocarbons |
| nonacos-1-ene                                                   | 8h, 15h      | DTD-GC-MS   | 156989 | Unsaturated aliphatic hydrocarbons |
| pentacos-1-ene                                                  | 15h          | DTD-GC-MS   | 528972 | Unsaturated aliphatic hydrocarbons |
| valine                                                          | 5d, 11d, 13d | NMR         | 6287   | Valine and derivatives             |
| 5,7-dihydroxy-2-(3-hydroxy-4-methoxy-phenyl)-3-methoxy-chromone | 1a, 2a       | UHPLC-MS/MS |        |                                    |
| 5-vinyl-guaiacol                                                | 10c          | GC-O        |        |                                    |
| anisyl palmitate                                                | 8h, 15h, 10c | GC-MS       |        |                                    |
| dracunculifoside J                                              | 1a, 2a       | UHPLC-MS/MS |        |                                    |
| glucoside A                                                     | 11d          | NMR         |        |                                    |
| glucoside B                                                     | 5d, 11d, 13d | NMR         |        |                                    |
| hydroxydi-hydromaltol                                           | 8h, 15h      | DTD-GC-MS   |        |                                    |
| methyl-2-(4-hydroxyphenoxy) benzoate                            | 15h          | DTD-GC-MS   |        |                                    |
| p-hydroxybenzyl alcohol glucoside                               | 5d, 11d, 13d | NMR         |        |                                    |
| $\gamma$ -aminobutyric acid                                     | 5d, 11d, 13d | NMR         |        |                                    |

---

1 = *V. bahiana*, 2 = *V. chamissonis*, 3 = *V. crenulata*, 4 = *V. imperialis*, 5 = *V. palmarum*, 6 = *V. planifolia* x *V. phaeantha*, 7 = *V. planifolia* x *V. pompona*, 8 = *V. pompona* (from Madagascar), 9 = *V. pompona* (origin unknown), 10 = *V. pompona* Shiede (cured), 11 = *V. pompona* subsp *grandiflora*, 12 = *V. pompona* subsp *pittieri*, 13 = *V. ribeiroi*, 14 = *V. sotoarenasii*, 15 = Wild Type (from Peru), 16 = *V. pompona* (flowers); a = [1], b = [2], c = [3], d = [4] \*, e = [5], f = [6] \*, g = [7], h = [8], i = [9] \*\*. \* Study based on leaves. \*\* Study based on flowers.

## References

1. da Silva Oliveira, Joana Paula, Rafael Garrett, Maria Gabriela Bello Koblitiz, and Andrea Furtado Macedo. "Vanilla flavor: Species from the Atlantic forest as natural alternatives." *Food Chemistry* 375 (2022): 131891. <https://doi.org/10.1016/j.foodchem.2021.131891>
2. Ehlers, Dorothea, and Michael Pfister. "Compounds of vanillons (*Vanilla pompona* Schiede)." *Journal of Essential Oil Research* 9, no. 4 (1997): 427-431. <https://doi.org/10.1080/10412905.1997.9700743>
3. Galeas, Maria Del Pilar. "Gas chromatography-mass spectrometry and gas chromatography-olfactometry analysis of aroma compounds of *Vanilla pompona* Schiede." PhD diss., Rutgers The State University of New Jersey-New Brunswick, 2015.
4. Leyva, Vanessa E., Juan M. Lopez, Alvaro Zevallos-Ventura, Rodrigo Cabrera, Cristhian Cañari-Chumpitaz, David Toubiana, and Helena Maruenda. "NMR-based leaf metabolic profiling of *V. planifolia* and three endemic *Vanilla* species from the Peruvian Amazon." *Food Chemistry* 358 (2021): 129365. <https://doi.org/10.1016/j.foodchem.2021.129365>
5. Maruenda, Helena, Maria del Lujan Vico, J. Ethan Householder, John P. Janovec, Cristhian Cañari, Angelica Naka, and Ana E. Gonzalez. "Exploration of *Vanilla pompona* from the Peruvian Amazon as a potential source of vanilla essence: Quantification of phenolics by HPLC-DAD." *Food Chemistry* 138, no. 1 (2013): 161-167. <https://doi.org/10.1016/j.foodchem.2012.10.037>
6. Palama, Tony Lionel, Michel Grisoni, Isabelle Fock-Bastide, Katia Jade, Laetitia Bartet, Young Hae Choi, Robert Verpoorte, and Hippolyte Kodja. "Metabolome of *Vanilla planifolia* (Orchidaceae) and related species under Cymbidium mosaic virus (CymMV) infection." *Plant physiology and biochemistry* 60 (2012): 25-34. <https://doi.org/10.1016/j.plaphy.2012.07.015>
7. Pérez-Silva, Araceli, Mayra Nicolás-García, Thomas Petit, Jean Bernard Dijoux, María de los Ángeles Vivar-Vera, Pascale Besse, and Michel Grisoni. "Quantification of the aromatic potential of ripe fruit of *Vanilla planifolia* (Orchidaceae) and several of its closely and distantly related species and hybrids." *European Food Research and Technology* 247, no. 6 (2021): 1489-1499. <https://doi.org/10.1007/s00217-021-03726-w>
8. Toth, Stephen, Keun Joong Lee, Daphna Havkin-Frenkel, Faith C. Belanger, and Thomas G. Hartman, eds. "Volatile compounds in vanilla." *Handbook of vanilla science and technology* (2018): 285-347. <https://doi.org/10.1002/9781119377320.ch17>
9. Watteyn, Charlotte, Daniela Scaccabarozzi, Bart Muys, Nele Van Der Schueren, Koenraad Van Meerbeek, Maria F. Guizar Amador, James D. Ackerman et al. "Trick or treat? Pollinator attraction in *Vanilla pompona* (Orchidaceae)." *Biotropica* 54, no. 1 (2022): 268-274.
